# Supplementary material for: Phase Transition Behaviors of Poly(N-isopropylacrylamide) Nanogels with Different Compositions Induced by (−)-Epigallocatechin-3-gallate and Ethyl Gallate
Source: MDPI journal article supplement (doi:10.3390/molecules28237823), 2023-11-28
Supplement: s1 [file s1]

## Supporting Information

# Phase Transition Behaviors of Poly(*N*-isopropylacrylamide) Nanogels with Different Compositions Induced by (-)-Epigallocatechin-3-gallate and Ethyl Gallate

Ke Deng <sup>1</sup>, Yafei Wang <sup>1</sup>, Lei Wang <sup>1</sup>, Xianli Fan <sup>1</sup>, Zhenyu Wu <sup>1</sup>, Xue Wen <sup>2</sup>, Wen Xie <sup>2</sup>, Hong Wang <sup>2</sup>,  
Zheng Zhou <sup>1</sup>, Pengfei Chen <sup>1</sup> and Xianggui Chen <sup>1,\*</sup>

<sup>1</sup> School of Food and Bioengineering, Xihua University, Chengdu 610039, China; kelvin\_de@126.com (K.D.); wyf@stu.xhu.edu.cn (Y.W.); 212021086000031@stu.xhu.edu.cn (L.W.); 18383013920@139.com (X.F.); zhenyuwu1807@gmail.com (Z.W.); zhousheng@mail.xhu.edu.cn (Z.Z.); 1220180037@mail.xhu.edu.cn (P.C.)

<sup>2</sup> School of Life Science and Engineering, Southwest Jiaotong University, Chengdu 610031, China; wenxue0703@my.swjtu.edu.cn (X.W.); xiewen@my.swjtu.edu.cn (W.X.)

\* Correspondence: chen\_xianggui@mail.xhu.edu.cn

## Supplementary Figures S1 and S2

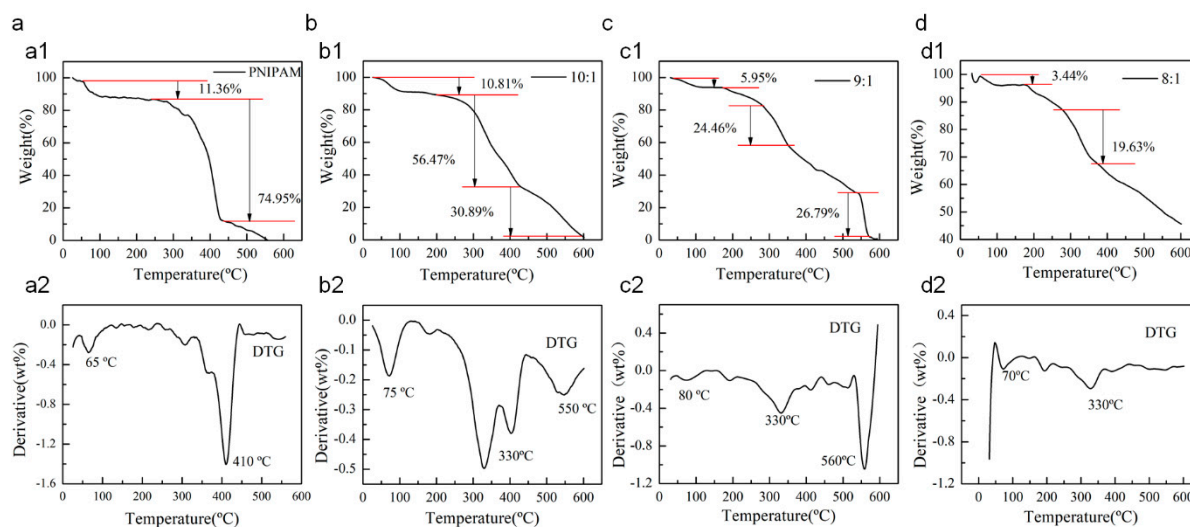

Figure S1. TGA (a1, b1, c1, d1) and DTG (a2, b2, c2, d2) curves from 25 to 600 °C of the PNIPAM microgels (a) and P(NIPAM-co-NMAM) nanogels with different monomer ratios of 10:1 (b), 9:1 (c), and 8:1 (d).

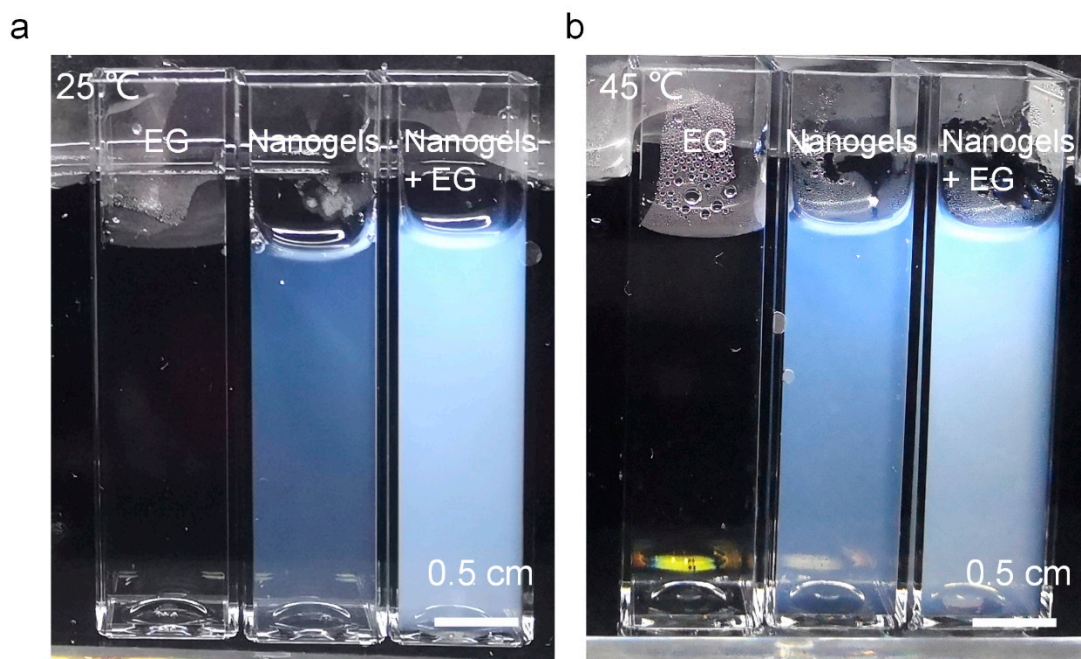

Figure S2. Optical images of EG, nanogels, and nanogels + EG in aqueous solution at 25 °C (a) and 45 °C (b). The PNIPAM-*co*-HEMA nanogels with monomer ratio of 99:1 (5 mg/mL) were used. The concentration of EG is 10 mmol/L.

**Table S1 PDI of P(NIPAM-*co*-HEMA) nanogels in water at 25 °C**

| Nanogels with different monomer ratios | PDI   |
|----------------------------------------|-------|
| NIPAM: HEMA = 99:1                     | 0.066 |
| NIPAM: HEMA = 95:5                     | 0.158 |
| NIPAM: HEMA = 90:10                    | 0.047 |
| NIPAM: HEMA = 80:20                    | 0.087 |

**Table S2 PDI of P(NIPAM-*co*-HEMA) nanogels with NIPAM:HEAM = 95:5 in 10 mmol/L EGCG at different temperatures**

| Temperatures (°C) | PDI   |
|-------------------|-------|
| 5                 | 0.110 |
| 9                 | 0.107 |
| 13                | 0.117 |
| 17                | 0.096 |
| 21                | 0.109 |
| 25                | 0.1   |
| 29                | 0.11  |
| 33                | 0.089 |
| 37                | 0.108 |
| 41                | 0.095 |
| 45                | 0.102 |
